# Supplementary material for: Substrate-biased activity-based probes identify the urokinase-plasminogen axis as a master regulator of metastatic signaling by orphan membrane receptor CDCP1
Source: Research Square preprint supplement (doi:10.21203/rs.3.rs-92391/v1), 2020-10-30
Supplement: Supplementary file 2 [file 6e11190c161088a6530e4955.xlsx]

## Sheet: Supp Table 1
Table S1: List of proteins identified in MS analysis (Human proteome database)
Abundance			Protein Id.			MS data
Ratio Probe 1 vs. Probe 2	Abundances Probe 1	Abundances Probe 2	Accession	Description	Molecular function (Panther)	Sum PEP Score	Coverage [%]	# Peptides	# PSMs	# Unique Peptides	Score Sequest HT: Sequest HT	# Peptides (by Search Engine): Sequest HT	# Razor Peptides
6.696	174	26	P00749	Urokinase-type plasminogen activator OS=Homo sapiens OX=9606 GN=PLAU PE=1 SV=2	serine protease(PC00203)	6.795	10	6	6	6	10	6	0
6.497	173.3	26.7	P02656	Apolipoprotein C-III OS=Homo sapiens OX=9606 GN=APOC3 PE=1 SV=1	N/A	4.815	19	2	2	2	5.55	2	0
5.086	167.1	32.9	P13639	Elongation factor 2 OS=Homo sapiens OX=9606 GN=EEF2 PE=1 SV=4	G-protein(PC00020);hydrolase(PC00121);translation elongation factor(PC00222);translation initiation factor(PC00224)	4.039	4	2	2	2	4.12	2	0
4.297	162.2	37.8	P04792	Heat shock protein beta-1 OS=Homo sapiens OX=9606 GN=HSPB1 PE=1 SV=2	N/A	5.046	17	2	3	2	6.37	2	0
3.732	157.7	42.3	P62280	40S ribosomal protein S11 OS=Homo sapiens OX=9606 GN=RPS11 PE=1 SV=3	ribosomal protein(PC00202)	3.927	19	2	3	2	2.96	2	0
3.302	153.5	46.5	P39019	40S ribosomal protein S19 OS=Homo sapiens OX=9606 GN=RPS19 PE=1 SV=2	ribosomal protein(PC00202)	3.206	19	3	3	3	6.95	3	0
3.014	150.2	49.8	P02787	Serotransferrin OS=Homo sapiens OX=9606 GN=TF PE=1 SV=3	receptor(PC00197);transfer/carrier protein(PC00219)	13.651	19	11	12	11	19.92	11	0
2.736	146.5	53.5	P06733	Alpha-enolase OS=Homo sapiens OX=9606 GN=ENO1 PE=1 SV=2	lyase(PC00144)	2.347	12	3	3	3	2.09	3	0
2.694	145.9	54.1	Q05639	Elongation factor 1-alpha 2 OS=Homo sapiens OX=9606 GN=EEF1A2 PE=1 SV=1	G-protein(PC00020);hydrolase(PC00121);translation elongation factor(PC00222);translation initiation factor(PC00224)	4.129	4	2	3	2	8.14	2	0
2.47	142.4	57.6	P62701	40S ribosomal protein S4, X isoform OS=Homo sapiens OX=9606 GN=RPS4X PE=1 SV=2	ribosomal protein(PC00202)	6.459	14	4	4	4	10.28	4	0
2.431	141.7	58.3	P26641	Elongation factor 1-gamma OS=Homo sapiens OX=9606 GN=EEF1G PE=1 SV=3	N/A	1.905	5	2	2	2	4.75	2	0
2.42	141.5	58.5	P52272	Heterogeneous nuclear ribonucleoprotein M OS=Homo sapiens OX=9606 GN=HNRNPM PE=1 SV=3	ribonucleoprotein(PC00201)	2.726	3	2	2	2	4.61	2	0
2.12	135.9	64.1	P07437	Tubulin beta chain OS=Homo sapiens OX=9606 GN=TUBB PE=1 SV=2	tubulin(PC00228)	18.467	25	8	17	1	22.51	8	10
1.994	133.2	66.8	P62266	40S ribosomal protein S23 OS=Homo sapiens OX=9606 GN=RPS23 PE=1 SV=3	ribosomal protein(PC00202)	3.168	15	2	2	2	5.47	2	0
1.948	132.2	67.8	P68363	Tubulin alpha-1B chain OS=Homo sapiens OX=9606 GN=TUBA1B PE=1 SV=1	tubulin(PC00228)	16.241	26	7	13	7	29.39	7	0
1.877	130.5	69.5	P08243	Asparagine synthetase [glutamine-hydrolyzing] OS=Homo sapiens OX=9606 GN=ASNS PE=1 SV=4	cysteine protease(PC00081);ligase(PC00142)	3.232	5	2	2	2	2.71	2	0
1.827	129.3	70.7	P08708	40S ribosomal protein S17 OS=Homo sapiens OX=9606 GN=RPS17 PE=1 SV=2	ribosomal protein(PC00202)	7.974	24	3	6	3	10.31	3	0
1.756	127.4	72.6	P69905	Hemoglobin subunit alpha OS=Homo sapiens OX=9606 GN=HBA1 PE=1 SV=2	N/A	1.633	6	2	2	2	2.13	2	0
1.749	127.3	72.7	Q13509	Tubulin beta-3 chain OS=Homo sapiens OX=9606 GN=TUBB3 PE=1 SV=2	tubulin(PC00228)	15.926	17	7	16	1	18.55	7	0
1.716	126.4	73.6	P08238	Heat shock protein HSP 90-beta OS=Homo sapiens OX=9606 GN=HSP90AB1 PE=1 SV=4	Hsp90 family chaperone(PC00028)	1.542	3	2	2	2	0	2	0
1.646	124.4	75.6	Q95604	HLA class I histocompatibility antigen, Cw-17 alpha chain OS=Homo sapiens OX=9606 GN=HLA-C PE=1 SV=1	N/A	2.487	7	2	2	2	2.2	2	0
1.582	122.5	77.5	P55060	Exportin-2 OS=Homo sapiens OX=9606 GN=CSE1L PE=1 SV=3	small GTPase(PC00208);transporter(PC00227)	2.801	2	2	2	2	4.6	2	0
1.581	122.5	77.5	P23396	40S ribosomal protein S3 OS=Homo sapiens OX=9606 GN=RPS3 PE=1 SV=2	ribosomal protein(PC00202)	3.417	11	3	3	3	4.9	3	0
1.489	119.6	80.4	P04406	Glyceraldehyde-3-phosphate dehydrogenase OS=Homo sapiens OX=9606 GN=GAPDH PE=1 SV=3	dehydrogenase(PC00092)	2.598	8	2	2	2	4.38	2	0
1.419	117.3	82.7	P60709	Actin, cytoplasmic 1 OS=Homo sapiens OX=9606 GN=ACTB PE=1 SV=1	actin and actin related protein(PC00039)	2.155	9	2	2	2	5.69	2	0
1.397	116.6	83.4	P68371	Tubulin beta-4B chain OS=Homo sapiens OX=9606 GN=TUBB4B PE=1 SV=1	tubulin(PC00228)	15.144	20	7	15	1	16.86	7	0
1.397	116.6	83.4	P62269	40S ribosomal protein S18 OS=Homo sapiens OX=9606 GN=RPS18 PE=1 SV=3	N/A	3.543	20	3	3	3	5.95	3	0
1.365	115.4	84.6	P62851	40S ribosomal protein S25 OS=Homo sapiens OX=9606 GN=RPS25 PE=1 SV=1	N/A	4.356	14	2	3	2	5.72	2	0
1.311	113.4	86.6	P62249	40S ribosomal protein S16 OS=Homo sapiens OX=9606 GN=RPS16 PE=1 SV=2	N/A	4.206	16	3	3	3	7.93	3	0
1.293	112.8	87.2	P46782	40S ribosomal protein S5 OS=Homo sapiens OX=9606 GN=RPS5 PE=1 SV=4	ribosomal protein(PC00202)	4.849	18	3	3	3	6.16	3	0
1.172	107.9	92.1	P62899	60S ribosomal protein L31 OS=Homo sapiens OX=9606 GN=RPL31 PE=1 SV=1	ribosomal protein(PC00202)	1.692	13	2	2	2	2.29	2	0
1.036	101.8	98.2	P61247	40S ribosomal protein S3a OS=Homo sapiens OX=9606 GN=RPS3A PE=1 SV=2	cysteine protease(PC00081);ribosomal protein(PC00202)	3.124	9	2	2	2	3.01	2	0
0.955	97.7	102.3	P43490	Nicotinamide phosphoribosyltransferase OS=Homo sapiens OX=9606 GN=NAMPT PE=1 SV=1	cytokine(PC00083)	6.45	10	4	5	4	9.23	4	0
0.952	97.6	102.4	P12273	Prolactin-inducible protein OS=Homo sapiens OX=9606 GN=PIP PE=1 SV=1	N/A	3.987	14	2	3	2	4.71	2	0
0.905	95	105	Q02413	Desmoglein-1 OS=Homo sapiens OX=9606 GN=DSG1 PE=1 SV=2	cadherin(PC00057);cell junction protein(PC00070)	2.631	3	2	2	2	5.68	2	0
0.638	77.9	122.1	P15924	Desmoplakin OS=Homo sapiens OX=9606 GN=DSP PE=1 SV=3	intermediate filament binding protein(PC00130)	1.867	1	2	2	2	1.95	2	0
0.613	76	124	P10909	Clusterin OS=Homo sapiens OX=9606 GN=CLU PE=1 SV=1	N/A	16.363	19	9	11	9	19.9	9	0
0.563	72.1	127.9	P13647	Keratin, type II cytoskeletal 5 OS=Homo sapiens OX=9606 GN=KRT5 PE=1 SV=3	N/A	23.773	28	15	17	7	32.35	15	0
0.518	68.3	131.7	P02538	Keratin, type II cytoskeletal 6A OS=Homo sapiens OX=9606 GN=KRT6A PE=1 SV=3	N/A	29.334	28	16	19	3	39.09	16	7
0.397	56.9	143.1	P08779	Keratin, type I cytoskeletal 16 OS=Homo sapiens OX=9606 GN=KRT16 PE=1 SV=4	N/A	8.447	17	6	6	3	11.25	6	0
0.375	54.5	145.5	P04259	Keratin, type II cytoskeletal 6B OS=Homo sapiens OX=9606 GN=KRT6B PE=1 SV=5	N/A	26.461	28	15	17	3	35.67	15	0
0.32	48.5	151.5	P02533	Keratin, type I cytoskeletal 14 OS=Homo sapiens OX=9606 GN=KRT14 PE=1 SV=4	N/A	9.567	15	7	7	2	18.21	7	5
0.274	43	157	P04264	Keratin, type II cytoskeletal 1 OS=Homo sapiens OX=9606 GN=KRT1 PE=1 SV=6	N/A	91.568	52	36	67	35	154.61	36	1
0.272	42.7	157.3	P35527	Keratin, type I cytoskeletal 9 OS=Homo sapiens OX=9606 GN=KRT9 PE=1 SV=3	N/A	46.8	40	18	33	18	100.68	18	0
0.26	41.2	158.8	Q7Z794	Keratin, type II cytoskeletal 1b OS=Homo sapiens OX=9606 GN=KRT77 PE=1 SV=3	N/A	2.236	4	2	2	2	2.85	2	0
0.26	41.2	158.8	P13645	Keratin, type I cytoskeletal 10 OS=Homo sapiens OX=9606 GN=KRT10 PE=1 SV=6	N/A	61.461	42	21	41	21	108.14	21	0
0.257	40.9	159.1	P35908	Keratin, type II cytoskeletal 2 epidermal OS=Homo sapiens OX=9606 GN=KRT2 PE=1 SV=2	N/A	68.587	48	31	50	26	119.12	31	5
0.151	26.2	173.8	Q04695	Keratin, type I cytoskeletal 17 OS=Homo sapiens OX=9606 GN=KRT17 PE=1 SV=2	N/A	4.778	10	5	5	2	11.59	5	0
