# Supplementary material for: Substrate-biased activity-based probes identify the urokinase-plasminogen axis as a master regulator of metastatic signaling by orphan membrane receptor CDCP1
Source: Research Square preprint supplement (doi:10.21203/rs.3.rs-92391/v1), 2020-10-30
Supplement: Supplementary file 3 [file 887ad0925519500705b6cf1c.xlsx]

## Sheet: Supp Table 6
Table S6: List of primers used in RTqPCR experiments
	Forward (5'-3')	Reverse (5'-3')
uPA	CCAAAGGCAGCAATGAACTTC	GGCATGGTACGTTTGCTGAA
CDCP1	GCCACGAGAAAGCAACATTACA	AAAGGACATGGGCCTGACATA
uPAR	CTGCTGCTGCTCCACACCT	ACTCTTCCACACGGCAATCCC
PAI1	CTCTCTCTGCCCTCACCAA	GAAACTGTCTGAACATGTCG
ACTB	TTGCTGACAGGATGCAGAAG	ACATCTGCTGGAAGGTGGAC
