# Supplementary material for: Substrate-biased activity-based probes identify the urokinase-plasminogen axis as a master regulator of metastatic signaling by orphan membrane receptor CDCP1
Source: Research Square preprint supplement (doi:10.21203/rs.3.rs-92391/v1), 2020-10-30
Supplement: Supplementary file 4 [file a2473a44917ae4b0f4444e4a.xlsx]

## Sheet: Supp Table 3
Table S3: List of proteins identified in MS analysis (Bovin proteome database)
Abundance			Protein Id.			MS data
Ratio Probe 1 vs. Probe 2	Abundances Probe 1	Abundances Probe 2	Accession	Description	Molecular function (Panther)	Sum PEP Score	Coverage [%]	# Peptides	# PSMs	# Unique Peptides	Score Sequest HT	# Peptides	# Razor Peptides
9.379	19.3	180.7	Q3T087	60S ribosomal protein L11 OS=Bos taurus OX=9913 GN=RPL11 PE=2 SV=3	ribosomal protein(PC00202)	2.244	12	2	2	2	3.11	2	0
8.913	20.2	179.8	P15497	Apolipoprotein A-I OS=Bos taurus OX=9913 GN=APOA1 PE=1 SV=3	N/A	7.905	23	6	6	6	12.57	6	0
8.807	20.4	179.6	E1B726	Plasminogen OS=Bos taurus OX=9913 GN=PLG PE=3 SV=2	serine protease(PC00203)	9.558	8	7	8	7	16.4	7	0
6.497	26.7	173.3	P19035	Apolipoprotein C-III OS=Bos taurus OX=9913 GN=APOC3 PE=1 SV=2	N/A	4.203	20	2	2	2	5.55	2	0
4.924	33.8	166.2	Q3T0V4	40S ribosomal protein S11 OS=Bos taurus OX=9913 GN=RPS11 PE=2 SV=3	ribosomal protein(PC00202)	2.393	19	2	2	2	2.96	2	0
4.419	36.9	163.1	A0A140T897	Serum albumin OS=Bos taurus OX=9913 GN=ALB PE=4 SV=1	transfer/carrier protein(PC00219)	170.878	84	67	169	67	434.11	67	0
3.791	41.7	158.3	F1MSZ6	Antithrombin-III OS=Bos taurus OX=9913 GN=SERPINC1 PE=3 SV=1	serine protease inhibitor(PC00204)	1.939	6	2	2	2	3.02	2	0
3.597	43.5	156.5	E1BHA5	Uncharacterized protein OS=Bos taurus OX=9913 PE=4 SV=1	ribosomal protein(PC00202)	3.123	14	2	2	2	5.1	2	0
3.578	43.7	156.3	Q3SZV7	Hemopexin OS=Bos taurus OX=9913 GN=HPX PE=2 SV=1	metalloprotease(PC00153)	4.801	7	3	3	3	5.44	3	0
3.405	45.4	154.6	F1MMK9	Protein AMBP OS=Bos taurus OX=9913 GN=AMBP PE=4 SV=2	N/A	4.976	11	4	4	4	8.11	4	0
2.919	51	149	G8JKW7	Uncharacterized protein OS=Bos taurus OX=9913 GN=SERPINA3 PE=3 SV=1	serine protease inhibitor(PC00204)	4.215	9	3	3	1	9.04	3	0
2.694	54.1	145.9	Q32PH8	Elongation factor 1-alpha 2 OS=Bos taurus OX=9913 GN=EEF1A2 PE=2 SV=1	G-protein(PC00020);hydrolase(PC00121);translation elongation factor(PC00222);translation initiation factor(PC00224)	4.654	4	2	3	2	8.14	2	0
2.671	54.5	145.5	Q5E947	Peroxiredoxin-1 OS=Bos taurus OX=9913 GN=PRDX1 PE=2 SV=1	peroxidase(PC00180)	4.05	14	2	2	2	6.12	2	0
2.61	55.4	144.6	P02081	Hemoglobin fetal subunit beta OS=Bos taurus OX=9913 PE=1 SV=1	N/A	5.087	39	4	4	4	10.38	4	0
2.522	56.8	143.2	F1N5M2	Vitamin D-binding protein OS=Bos taurus OX=9913 GN=GC PE=4 SV=2	transfer/carrier protein(PC00219)	6.937	6	3	4	3	11.77	3	0
2.514	56.9	143.1	E1BI82	Inhibitor of carbonic anhydrase precursor OS=Bos taurus OX=9913 GN=LOC525947 PE=1 SV=2	receptor(PC00197);serine protease(PC00203);transfer/carrier protein(PC00219)	2.205	2	2	2	2	1.9	2	0
2.47	57.6	142.4	A2VE06	40S ribosomal protein S4 OS=Bos taurus OX=9913 GN=RPS4Y1 PE=2 SV=1	ribosomal protein(PC00202)	5.339	14	4	4	4	10.28	4	0
2.373	59.3	140.7	P12763	Alpha-2-HS-glycoprotein OS=Bos taurus OX=9913 GN=AHSG PE=1 SV=2	protease inhibitor(PC00191)	2.251	6	2	2	2	5.01	2	0
2.082	64.9	135.1	Q3T0R1	40S ribosomal protein S18 OS=Bos taurus OX=9913 GN=RPS18 PE=2 SV=3	N/A	3.813	16	3	3	3	5.95	3	0
2.058	65.4	134.6	Q2KJD0	Tubulin beta-5 chain OS=Bos taurus OX=9913 GN=TUBB5 PE=2 SV=1	tubulin(PC00228)	14.069	22	7	10	2	15.75	7	6
1.994	66.8	133.2	E1B8G4	Uncharacterized protein OS=Bos taurus OX=9913 PE=3 SV=2	ribosomal protein(PC00202)	2.584	15	2	2	2	5.47	2	0
1.948	67.8	132.2	P81947	Tubulin alpha-1B chain OS=Bos taurus OX=9913 PE=1 SV=2	tubulin(PC00228)	15.371	26	7	13	7	29.39	7	0
1.877	69.5	130.5	F1MMD7	Inter-alpha-trypsin inhibitor heavy chain H4 OS=Bos taurus OX=9913 GN=ITIH4 PE=4 SV=2	serine protease inhibitor(PC00204)	2.905	4	3	3	3	2.07	3	0
1.827	70.7	129.3	A0A140T832	40S ribosomal protein S17 OS=Bos taurus OX=9913 GN=RPS17 PE=3 SV=1	ribosomal protein(PC00202)	7.105	24	3	6	3	10.31	3	0
1.8	71.4	128.6	A2I7M9	Serpin A3-2 OS=Bos taurus OX=9913 GN=SERPINA3-2 PE=3 SV=1	serine protease inhibitor(PC00204)	3.547	8	3	3	1	8.08	3	2
1.733	73.2	126.8	P60712	Actin, cytoplasmic 1 OS=Bos taurus OX=9913 GN=ACTB PE=1 SV=1	actin and actin related protein(PC00039)	3.757	16	4	4	4	8.11	4	0
1.582	77.5	122.5	A5D785	Exportin-2 OS=Bos taurus OX=9913 GN=CSE1L PE=2 SV=1	small GTPase(PC00208);transporter(PC00227)	2.499	2	2	2	2	4.6	2	0
1.457	81.4	118.6	Q3T0X6	40S ribosomal protein S16 OS=Bos taurus OX=9913 GN=RPS16 PE=2 SV=3	N/A	4.503	24	4	4	4	7.93	4	0
1.397	83.4	116.6	Q3MHM5	Tubulin beta-4B chain OS=Bos taurus OX=9913 GN=TUBB4B PE=2 SV=1	tubulin(PC00228)	11.122	18	6	8	1	10.11	6	0
1.172	92.1	107.9	Q56JX3	60S ribosomal protein L31 OS=Bos taurus OX=9913 GN=RPL31 PE=2 SV=1	ribosomal protein(PC00202)	1.644	13	2	2	2	2.29	2	0
1.036	98.2	101.8	G3N262	40S ribosomal protein S3a OS=Bos taurus OX=9913 GN=RPS3A PE=3 SV=1	cysteine protease(PC00081);ribosomal protein(PC00202)	2.75	9	2	2	2	3.01	2	0
0.948	102.7	97.3	F1MJ80	Nicotinamide phosphoribosyltransferase OS=Bos taurus OX=9913 GN=NAMPT PE=4 SV=1	cytokine(PC00083)	3.589	8	3	3	3	5.34	3	0
0.649	121.3	78.7	F1MUY2	Uncharacterized protein OS=Bos taurus OX=9913 GN=KRT6B PE=1 SV=1	N/A	12.632	13	8	8	4	15.77	8	0
0.582	126.5	73.5	G5E513	Uncharacterized protein OS=Bos taurus OX=9913 PE=1 SV=1	N/A	14.311	12	5	8	2	27.15	5	2
0.478	135.4	64.6	F1MC11	Keratin, type I cytoskeletal 14 OS=Bos taurus OX=9913 GN=KRT14 PE=1 SV=2	N/A	4.522	11	5	5	4	8.94	5	0
0.363	146.7	53.3	G3MXL3	Keratin 3 OS=Bos taurus OX=9913 GN=KRT3 PE=1 SV=1	N/A	13.827	10	7	9	3	14.89	7	0
0.318	151.7	48.3	F1MFW9	Keratin 24 OS=Bos taurus OX=9913 GN=KRT24 PE=3 SV=2	N/A	2.166	4	2	2	2	2.83	2	0
0.295	154.4	45.6	G3N0V2	Keratin 1 OS=Bos taurus OX=9913 GN=KRT1 PE=1 SV=1	N/A	11.253	7	5	7	4	22.09	5	0
0.283	155.9	44.1	A6QNZ7	Keratin 10 (Epidermolytic hyperkeratosis; keratosis palmaris et plantaris) OS=Bos taurus OX=9913 GN=KRT10 PE=2 SV=1	N/A	8.552	7	5	7	4	15.08	5	1
0.276	156.7	43.3	Q29S21	Keratin, type II cytoskeletal 7 OS=Bos taurus OX=9913 GN=KRT7 PE=2 SV=1	N/A	8.45	7	3	5	1	9.93	3	0
0.228	162.8	37.2	G5E5T5	Uncharacterized protein OS=Bos taurus OX=9913 PE=1 SV=1	major histocompatibility complex antigen(PC00149)	13.41	18	5	8	2	25.84	5	0
0.153	173.5	26.5	Q5XQN5	Keratin, type II cytoskeletal 5 OS=Bos taurus OX=9913 GN=KRT5 PE=1 SV=1	N/A	11.864	12	8	10	3	13.4	8	4
			A0A0A0MP89	Serpin A3-8 OS=Bos taurus OX=9913 GN=SERPINA3-8 PE=3 SV=1	serine protease inhibitor(PC00204)	2.435	5	2	2	1	5.24	2	0
