# Supplementary material for: Substrate-biased activity-based probes identify the urokinase-plasminogen axis as a master regulator of metastatic signaling by orphan membrane receptor CDCP1
Source: Research Square preprint supplement (doi:10.21203/rs.3.rs-92391/v1), 2020-10-30
Supplement: Supplementary file 6 [file ffa42a596c21839e965e17f8.xlsx]

## Sheet: Supp Table 2
Table S2: List of peptides corresponding to uPA identified in MS analysis (Human proteome database)
Abundance			MS Data											Protein ID.
Ratio Probe 1 vs. Probe 2	Abundances Probe 1	Abundances Probe 2	Annotated Sequence	Modifications	Qvality PEP	Qvality q-value	# Missed Cleavages	Theo. MH+ [Da]	Percolator q-Value	Percolator PEP	Xcorr	# Proteins	# PSMs	Master Protein Accessions	Description	Positions in Master Proteins
6.602	173.7	26.3	[K].KFGGQHCEIDKSK.[T]	1xCarbamidomethyl [C7]; 3xTMT2plex [K1; K11; K13]; 1xTMT2plex [N-Term]	0.0520588	0	2	2434.37	0	0.04187	2.78	1	1	P00749	Urokinase-type plasminogen activator OS=Homo sapiens OX=9606 GN=PLAU PE=1 SV=2	56-68
6.965	174.9	25.1	[K].KFGGQHCEIDK.[S]	1xCarbamidomethyl [C7]; 2xTMT2plex [K1; K11]; 1xTMT2plex [N-Term]	0.0127658	0	1	1994.09	0	0.009817	2.86	1	1	P00749	Urokinase-type plasminogen activator OS=Homo sapiens OX=9606 GN=PLAU PE=1 SV=3	56-66
4.818	165.6	34.4	[K].YFSNIHWCNCPK.[K]	2xCarbamidomethyl [C8; C10]; 1xTMT2plex [K12]; 1xTMT2plex [N-Term]	0.122276	0.00300497	0	2076.01	0.002194	0.1017	1.96	1	1	P00749	Urokinase-type plasminogen activator OS=Homo sapiens OX=9606 GN=PLAU PE=1 SV=4	44-55
4.108	160.8	39.2	[K].KPSSPPEELK.[F]	2xTMT2plex [K1; K10]; 1xTMT2plex [N-Term]	0.157085	0.00300497	0	1787.07	0.002194	0.1318	2.28	1	1	P00749	Urokinase-type plasminogen activator OS=Homo sapiens OX=9606 GN=PLAU PE=1 SV=5	156-165
4.384	162.9	37.1	[K].FGGQHCEIDKSK.[T]	1xCarbamidomethyl [C6]; 2xTMT2plex [K10; K12]; 1xTMT2plex [N-Term]	0.162835	0.00300497	1	2081.12	0.002194	0.1367	2.88	1	1	P00749	Urokinase-type plasminogen activator OS=Homo sapiens OX=9606 GN=PLAU PE=1 SV=6	57-68
12.95	185.7	14.3	[K].FQCGQK.[T]	1xCarbamidomethyl [C3]; 1xTMT2plex [K6]; 1xTMT2plex [N-Term]	0.247183	0.00300497	0	1217.66	0.002194	0.213	1.98	1	1	P00749	Urokinase-type plasminogen activator OS=Homo sapiens OX=9606 GN=PLAU PE=1 SV=7	166-171
