# Supplementary material for: Substrate-biased activity-based probes identify the urokinase-plasminogen axis as a master regulator of metastatic signaling by orphan membrane receptor CDCP1
Source: Research Square preprint supplement (doi:10.21203/rs.3.rs-92391/v1), 2020-10-30
Supplement: Supplementary file 7 [file 2a77ff3d2f79f81a23c71c5d.xlsx]

## Sheet: Supp Table 5
Table S5: Yields, HRMS and LCMS Data corresponding to sbABPs 1-4
Compound	MW (Da) Found/Expected	Yield (%)	Gradient (ACN %)	Rt (min)
sbABP1	1213.5469/1213.5467	63	20 - 98	8.20 & 8.56
sbABP2	1094.4961/1094.4954	54	20 - 98	8.20 & 8.49
sbABP3	1180.3419/1180.3412	49	20 - 98	8.73 & 8.91
sbABP4	1123.2402/1123.2401	71	20 - 98	8.58 & 8.81
