# Supplementary material for: Substrate-biased activity-based probes identify the urokinase-plasminogen axis as a master regulator of metastatic signaling by orphan membrane receptor CDCP1
Source: Research Square preprint supplement (doi:10.21203/rs.3.rs-92391/v1), 2020-10-30
Supplement: Supplementary file 8 [file cd0b3ce4f7c5b608ba798c0f.xlsx]

## Sheet: Supp Table 4
Table S4: List of peptides corresponding to uPA identified in MS analysis (Human proteome database)
Abundance			MS Data											Protein ID.
Ratio Probe 1 vs. Probe 2	Abundances Probe 1	Abundances Probe 2	Annotated Sequence	Modifications	Qvality PEP	Qvality q-value	# Missed Cleavages	Theo. MH+ [Da]	Percolator q-Value	Percolator PEP	Xcorr	# Proteins	# PSMs	Master Protein Accessions	Description	Positions in Master Proteins
11.321	16.2	183.8	[K].LSRPAIITK.[E]	1xTMT2plex [K9]; 1xTMT2plex [N-Term]	0.187813	0	0	1448.95	0	0.1558	2.05	2	1	E1B726	Plasminogen OS=Bos taurus OX=9913 GN=PLG PE=3 SV=2	673-681
3.476	44.7	155.3	[K].VILGAHNEKVR.[E]	1xTMT2plex [K9]; 1xTMT2plex [N-Term]	0.00662987	0	1	1686.03	0	0.004888	2.8	3	1	E1B726	Plasminogen OS=Bos taurus OX=9913 GN=PLG PE=3 SV=2	637-647
2.9	51.3	148.7	[R].VSPYVPWIEETMR.[R]	1xOxidation [M12]; 1xTMT2plex [N-Term]	0.148356	0	0	1847.94	0	0.1218	1.17	2	1	E1B726	Plasminogen OS=Bos taurus OX=9913 GN=PLG PE=3 SV=2	798-810
3.427	45.2	154.8	[K].EAHLPVIENK.[V]	1xTMT2plex [K10]; 1xTMT2plex [N-Term]	0.152758	0	0	1599.94	0	0.1252	2.26	2	1	E1B726	Plasminogen OS=Bos taurus OX=9913 GN=PLG PE=3 SV=2	720-729
19.954	9.5	190.5	[R].LFREPSQADIALLK.[L]	1xTMT2plex [K14]; 1xTMT2plex [N-Term]	0.00583584	0	1	2051.22	0	0.004283	3.49	3	2	E1B726	Plasminogen OS=Bos taurus OX=9913 GN=PLG PE=3 SV=2	659-672
17.472	10.8	189.2	[R].GTSSTTITGR.[K]	1xTMT2plex [N-Term]	0.0496526	0	0	1205.66	0	0.039	2.33	3	1	E1B726	Plasminogen OS=Bos taurus OX=9913 GN=PLG PE=3 SV=2	394-403
20.683	9.2	190.8	[R].GTSSTTITGRK.[C]	1xTMT2plex [K11]; 1xTMT2plex [N-Term]	0.173005	0	1	1558.91	0	0.1427	1.82	3	1	E1B726	Plasminogen OS=Bos taurus OX=9913 GN=PLG PE=3 SV=2	394-404
